# Supplementary material for: The Effect of Silicon Dioxide Nanoparticles Combined with Entomopathogenic Bacteria or Fungus on the Survival of Colorado Potato Beetle and Cabbage Beetles
Source: MDPI journal article supplement (doi:10.3390/nano12091558), 2022-05-04
Supplement: s1 [file s1]

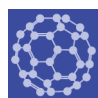

## Supplementary Materials

# The Effect of Silicon Dioxide Nanoparticles Combined with Entomopathogenic Bacteria or Fungus on the Survival of Colorado Potato Beetle and Cabbage Beetles

Elena I. Shatalova <sup>1,2,\*</sup>, Ekaterina V. Grizanova <sup>2,3</sup> and Ivan M. Dubovskiy <sup>1,2,3,\*</sup>

<sup>1</sup> Siberian Federal Scientific Centre of Agro-BioTechnologies of the Russian Academy of Sciences, 630501 Krasnoobsk, Russia

<sup>2</sup> Laboratory of Biological Plant Protection and Biotechnology, Novosibirsk State Agrarian University, Dobrolubova Str. 160, 630039 Novosibirsk, Russia; katalasa\_2006@yahoo.com

<sup>3</sup> Laboratory of Biotechnology of Microorganisms and Plants, Tomsk State University, 634050 Tomsk, Russia

\* Correspondence: elenashatalova@mail.ru (E.I.S.); dubovskiy2000@yahoo.com (I.M.D.); Tel.: +7-923-124-6896 (E.I.S.)

**Table S1.** Properties of nanoparticles used in this study.

| Product № | Modification                                                  | Product Properties                                                                                                                                                                                                                                                                                                                        | Images                                                                               | Link                |
|-----------|---------------------------------------------------------------|-------------------------------------------------------------------------------------------------------------------------------------------------------------------------------------------------------------------------------------------------------------------------------------------------------------------------------------------|--------------------------------------------------------------------------------------|---------------------|
| 6851HN    | Modified with amino group                                     | Nanopowder, SiO <sub>2</sub> , 99.8%, 10-20 nm<br>Loss on drying (%) (105 °C, 2h): <3<br>Loss on ignition (%) (950 °C, 2h): <10<br>SiO <sub>2</sub> content (dry basis) (%): >85<br>SiO <sub>2</sub> content (950 °C, 2h) (%): >99.8<br>Carbon content (%): >0.3<br>Surface area (m <sup>2</sup> /g): 90-130<br>Bulk density (g/ml): 0.15 | 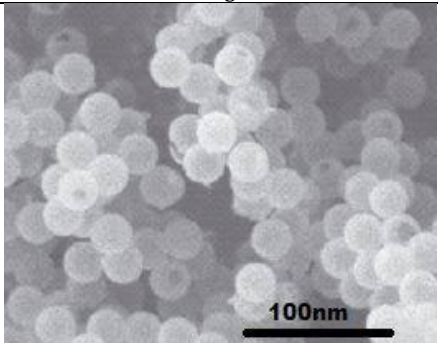 | *3 SiO <sub>2</sub> |
| 6811DL    | Treated with silane coupling agents (SiO <sub>2</sub> , 99%,) | Nanopowder, SiO <sub>2</sub> , 99%, 10-20nm<br>SiO <sub>2</sub> Nanopowder SSA: >400 m <sup>2</sup> /g<br>Silane content: 1~2wt%                                                                                                                                                                                                          |  | *2 SiO <sub>2</sub> |
| 6852HN    | Modified with epoxy group                                     | Nanopowder, SiO <sub>2</sub> , 99.8%, 10-20 nm<br>Loss on drying (%) (105 °C, 2h): <3<br>Loss on ignition (%) (950 °C, 2h): <12<br>SiO <sub>2</sub> content (dry basis) (%): >85<br>SiO <sub>2</sub> content (950 °C, 2h) (%): >99.8<br>Carbon content (%): >0.3<br>Surface area (m <sup>2</sup> /g): 90-130<br>Bulk density (g/ml): 0.15 | no picture                                                                           | *1 SiO <sub>2</sub> |

Images were provided by supplier: \*3 SiO<sub>2</sub> - <https://ssnano.com/inc/sdetail/silicon-oxide-nanoparticles--nanopowder-modified-with-amino-group/363>; \*2 SiO<sub>2</sub> - [https://ssnano.com/inc/sdetail/silicon\\_oxide\\_nanoparticles\\_99\\_0\\_/209](https://ssnano.com/inc/sdetail/silicon_oxide_nanoparticles_99_0_/209); \*1 SiO<sub>2</sub> - [https://ssnano.com/inc/sdetail/silicon\\_oxide\\_nanoparticles/364](https://ssnano.com/inc/sdetail/silicon_oxide_nanoparticles/364).

**Table S2.** Nanoparticle antifungal and antibacterial activity against *Metarhizium robertsii* (Mr) and *Bacillus thuringiensis* (Bt). Data presented as the number of colony-forming units (CFU) per Petri dish, three replicates per treatment; Mean $\pm$ SE, One -way ANOVA with Dunnett post-hoc comparison used for comparison of the nanoparticle effects on bacteria and fungi compared to the control (PBS treatment).

| Product            | Antibacterial (Bt)<br>CFU; p value | Antifungal (Mr)<br>CFU; p value |
|--------------------|------------------------------------|---------------------------------|
| PBS (control)      | 1795 $\pm$ 84.13                   | 2177 $\pm$ 107.4                |
| 1 SiO <sub>2</sub> | 1926 $\pm$ 18.41<br>p = 0.3296     | 2050 $\pm$ 50.33<br>p = 0.4856  |
| 2 SiO <sub>2</sub> | 1979 $\pm$ 69.29<br>p = 0.1325     | 2120 $\pm$ 70.00<br>p = 0.8951  |
| 3 SiO <sub>2</sub> | 1855 $\pm$ 38.75<br>p = 0.8170     | 2034 $\pm$ 33.88<br>p = 0.4021  |

### S.1 Method for nanoparticle antimicrobial activity analysis

The antimicrobial activity of three modifications of silicon dioxide nanoparticles (with epoxy (1 SiO<sub>2</sub>), silane (2 SiO<sub>2</sub>) and amide (3 SiO<sub>2</sub>) groups) was analysed against the fungus *Metarhizium robertsii* (Mr) and the bacterium *Bacillus thuringiensis ssp. morrisoni* var. *thuringiensis* (Bt). Fungus and bacteria (10<sup>4</sup> in PBS) were incubated with nanoparticles (1 mg per mL) for 4 h at 28 °C, and 250  $\mu$ L cultured on plates of Luria-Bertani (LB) medium (for Bt) or Czapek medium (for Mr). CFU of bacteria and fungi were counted at 24 h and at 3 days respectively post cultivation at 28 °C.
